# Supplementary material
Source: MDPI journal article supplement (https://www.mdpi.com/2073-4395/9/12/889)
Supplement: s1 [file s1]

**Table S1.** Edaphic characteristics of the fields in the area of Castellfollit del Boix, estimated from samples obtained at 8 representative sites where the bean landrace is cultivated.

|                                                   | Mean ( $\pm$ SE) | Max  | Min  |
|---------------------------------------------------|------------------|------|------|
| pH                                                | 8.2 $\pm$ 0.1    | 8.4  | 8    |
| Moisture (%)                                      | 1.2 $\pm$ 0.1    | 1.3  | 1    |
| Calcium carbonate equivalent (% dm <sup>1</sup> ) | 31 $\pm$ 1       | 35   | 27   |
| Electrical conductivity (dS/m)                    | 0.2 $\pm$ 0.0    | 0.23 | 0.16 |
| Cation exchange capacity (cmolc/kg dm)            | 9.5 $\pm$ 0.9    | 12.5 | 7.1  |
| Organic matter (% dm)                             | 2.4 $\pm$ 0.3    | 3.27 | 1.49 |
| Ca (mg/kg dm)                                     | 6202 $\pm$ 77    | 6442 | 5897 |
| Mg (mg/kg dm)                                     | 333 $\pm$ 38     | 453  | 190  |
| Na (mg/kg dm)                                     | 26 $\pm$ 2       | 31   | 20   |
| K (mg/kg dm)                                      | 309 $\pm$ 40     | 438  | 144  |
| N-nitric (mg/kg dm)                               | 19 $\pm$ 3       | 30   | 11   |
| P (mg/kg dm)                                      | 86 $\pm$ 18      | 130  | 12   |
| Coarse silt (0.02 < D <sup>2</sup> < 0.05mm) (%)  | 14.4 $\pm$ 0.7   | 16.6 | 11.9 |
| Fine coarse (0.002 < D < 0.02mm)(%)               | 24.2 $\pm$ 1.2   | 28.6 | 20.4 |
| Clay (D < 0.002 mm) (%)                           | 16.8 $\pm$ 0.6   | 18.8 | 14.8 |
| Total sand (0.05 < D < 2mm) (%)                   | 44.6 $\pm$ 1.7   | 51.2 | 39   |

<sup>1</sup>dm: dry matter; <sup>2</sup>D: diameter.

**Table S2.** Detail of the calculation of the indexes appearing in Table 10.

| <b>Items</b> |                                                  | <b>Definition</b>                                                                                                              |
|--------------|--------------------------------------------------|--------------------------------------------------------------------------------------------------------------------------------|
| 1            | Controlled multiplication of germplasm           | Degree of multiplication of germplasm done in an isolated and controlled way, with conservative selection                      |
| 2            | Morphological characterization                   | Degree of characterization of the morphological variability found in the landrace                                              |
| 3            | Agronomic characterization                       | Degree of characterization of the agronomic variability found in the landrace                                                  |
| 4            | Sensory characterization                         | Degree of characterization of the sensory variability found in the landrace                                                    |
| 5            | Chemical characterization                        | Degree of characterization of the chemical variability found in the landrace                                                   |
| 6            | Genetic characterization                         | Degree of characterization of the genetic variability found in the landrace                                                    |
| 7            | Characterization of environmental effects        | Degree of characterization of the effects of the environment on the variability found in the landrace                          |
| 8            | Edaphic description                              | Degree of characterization of the soils in the territory where the landrace has traditionally been cultivated                  |
| 9            | Climatic description                             | Degree of characterization of the climate in the territory where the landrace has traditionally been cultivated                |
| 10           | Historical/cultural documentation                | Degree of historical/cultural characterization of the uses of the landrace                                                     |
| 11           | Documentation of traditional cultivation methods | Degree of knowledge and documentation of the traditional methods of cultivating the landrace                                   |
| 12           | Bringing management technologies up to date      | Degree of exploration of new farming technologies and mechanization tried and/or incorporated into cultivation of the landrace |
| 13           | Associations among farmers                       | Degree of association among farmers for the purpose of exploiting and commercializing the landrace                             |
| 14           | European Union geographical quality label        | State of the process toward obtaining a European quality label                                                                 |
| 15           | External quality control                         | Degree of external quality control of the product's sensory traits                                                             |
| 16           | Farmers' preferences                             | Degree of formulation of farmers' preferences                                                                                  |
| 17           | Consumers' preferences                           | Degree of formulation of consumers' preferences                                                                                |
| 18           | Use in restaurants                               | Degree of use of the product in restaurants (mainly in the area of cultivation)                                                |
| 19           | Use in transformed products                      | Degree of transformation of the product (canning, etc.)                                                                        |
| 20           | Collective promotion in events                   | Degree of promotion of the product at fairs and events                                                                         |
